# Supplementary material
Source: HighWire-hosted journal article supplement (https://www.cmajopen.ca/highwire/filestream/84929/field_highwire_adjunct_files/3/2020-0140-original-submission.pdf)
Supplement: 2020-0140-original-submission.pdf [file 2020-0140-original-submission.pdf]

# Completeness Of Reporting For COVID-19 Case Reports, January to April 2020: A Meta-Epidemiologic Study

Michael A. Scaffidi, M.Ed<sup>1,2\*</sup>, Nikko Gimpaya, BSc<sup>2\*</sup>, Juana Li<sup>2</sup>, Rishi Bansal<sup>2</sup>, Yash Verma<sup>2</sup>,  
Karam Elsolh<sup>2</sup>, Gemma M. Donn, BMus<sup>2</sup>, Abhishek Panjwani, MD<sup>2</sup>, Rishad Khan, MD<sup>2,3</sup>, Samir  
C. Grover, MD<sup>2,3,4</sup>

Faculty of Health Sciences, School of Medicine, Queen's University<sup>1</sup>

Division of Gastroenterology, St. Michael's Hospital, University of Toronto<sup>2</sup>

Department of Medicine, University of Toronto<sup>3</sup>

Li Ka Shing Knowledge Institute, Toronto, Canada.<sup>4</sup>

\*Note: these two authors contributed equally for first authorship

**Number of words:** 2500

## Keywords:

- COVID-19
- Critical appraisal
- Case Reports
- Meta-epidemiologic

**Grant Support:** None

## Corresponding Author:

Dr. Samir C. Grover

Highest Academic Degree(s): MD, MEd, FRCPC

Affiliations: Division of Gastroenterology, St. Michael's Hospital

Department of Medicine, University of Toronto

Li Ka Shing Knowledge Institute, Toronto, Canada

Address: St. Michael's Hospital  
30 Bond Street, 16-036 Cardinal Carter Wing  
Toronto, ON  
Canada, M5B 1W8  
Phone: 416-864-5628  
Email: [samir.grover@utoronto.ca](mailto:samir.grover@utoronto.ca)

**Disclosures:**

Rishad Khan has received research grants from AbbVie and Ferring Pharmaceuticals and research funding from Pendopharm. Samir C. Grover has received research grants and personal fees from AbbVie and Ferring Pharmaceuticals, personal fees from Takeda, education grants from Janssen, and has equity in Volo Healthcare. All other authors have no disclosures.

**Author Contributions:**

*Draft and conceptualization:* Scaffidi, Gimpaya, Khan, Grover  
*Data curation:* Scaffidi, Gimpaya, Li, Verma, Elsolh, Bansal, Donn, Panjwani  
*Formal analysis:* Scaffidi, Gimpaya, Khan, Grover  
*Writing:* Scaffidi, Gimpaya, Li, Verma, Elsolh, Bansal, Donn, Panjwani, Khan, Grover  
*Project decision making:* Grover  
*Final manuscript approval:* Scaffidi, Gimpaya, Li, Verma, Elsolh, Bansal, Donn, Panjwani, Khan, Grover

**Role of the Sponsor:** No funding organization will have any role in the design and conduct of the study, collection, management, analysis and interpretation of the data, and preparation, review, or approval of the manuscript.

**Previous Presentations:** None

Confidential

1  
2  
3  
4  
5  
6  
7  
8  
9  
10  
11  
12  
13  
14  
15  
16  
17  
18  
19  
20  
21  
22  
23  
24  
25  
26  
27  
28  
29  
30  
31  
32  
33  
34  
35  
36  
37  
38  
39  
40  
41  
42  
43  
44  
45  
46  
47  
48  
49  
50  
51  
52  
53  
54  
55  
56  
57  
58  
59  
60

**ABSTRACT**

**Background:** We aimed to determine the completion of reporting (COR) for case reports published on COVID-19.

**Methods:** We conducted a systematic search of the MEDLINE database for all single-patient case reports of confirmed COVID-19 published between January 1, 2020 to April 24, 2020. All included case reports were assessed for adherence to Case Report (CARE) guidelines that consists of 31 items, which was used to create a composite COR score. The primary outcome was the mean COR score assessed by two independent raters.

**Results:** Our search identified 96 studies that were published in 67 journals. We found that the overall mean COR score was 62.6%. No one case report that included all of the 31 CARE checklist items. Articles published in the two-month period of January-February had a significantly lower mean COR scores compared to articles published in March-April ( $P=0.026$ ,  $d=0.6$ ). We did not identify any other significant factors that affected COR.

**Interpretation:** We found that the overall COR for case reports on COVID-19 was poor, and was significantly lower at the beginning of the pandemic. We recommend that journals adopt common case reporting standards to improve reporting quality.

**Key words:** COVID-19; Critical appraisal; Case Reports; Meta-epidemiologic

**Trial registration:** NA

**Abstract word count:** 192

## INTRODUCTION

The coronavirus disease 2019 (COVID-19) pandemic demands rapid access to high quality evidence. Case reports often provide the first published evidence for a disease, as they can detect novelties, generate hypotheses for future research, and offer insight into rare exposures and outcomes(1–4). In the early stages of an emerging infectious disease, case reports become integral pieces of evidence for interim planning and treatment decisions while higher quality observational and interventional studies are pending(4–6). There are concerns, however, that a rush to publication will result in poorer research quality during the current COVID-19 pandemic(7–9).

One area that may be adversely affected by this rush is research reporting quality. As with all research, case reports should meet strict requirements for completeness of reporting (COR) to ensure access to relevant information(10,11). Specifically, they should follow the Case Report (CARE) Statement and Checklist, a guideline that indicates best practices in case reporting(11). The most recent version, which was updated in 2016, covers 14 topic areas with a total of 31 checklist items(10). Several studies across a variety of domains and journals have evaluated COR for case reports by calculating a composite score of the number of CARE checklist items that were complete(12–16).

No studies have investigated the quality of reporting on COVID-19(9,17). Our aim was to determine COR of case-reports related to COVID-19, with a hypothesized overall

1  
2  
3  
4  
5  
6  
7  
8  
9  
10  
11  
12  
13  
14  
15  
16  
17  
18  
19  
20  
21  
22  
23  
24  
25  
26  
27  
28  
29  
30  
31  
32  
33  
34  
35  
36  
37  
38  
39  
40  
41  
42  
43  
44  
45  
46  
47  
48  
49  
50  
51  
52  
53  
54  
55  
56  
57  
58  
59  
60

COR score lower than the “acceptable” threshold of 75%(12). The secondary objectives involved determining whether COR was impacted by time of publication, print status, open access status and journal policies regarding CARE and publication ethics.

**METHODS**

We performed a meta-epidemiologic study modelled upon a similar study that examined COR for case reports(12). Reporting of our findings followed guidelines for the reporting of meta-epidemiological methodology research(18).

**Ethics approval**

We obtained an exemption from the research ethics board at our institution, as there was no primary patient data involved.

**Definitions**

According to the original CARE guideline publication, a case report is a “detailed narrative that describe[s], for medical, scientific, or educational purposes, a medical problem experienced by one or several patients”(11). To operationalize this definition, we considered ‘case reports’ to be any publications that had clinical information presented for a single patient. This included imaging reports, problem-solving cases, and correspondence.

## Study selection

We conducted a systematic search using a modification of the strategy proposed by the Centre for Disease Control (CDC) search recommendation for COVID-19(19). The full search can be found in **Appendix A**. We executed the search in Ovid MEDLINE for all case reports published between the dates of January 1, 2020 to April 24, 2020.

Two authors (MAS, JL) performed an initial screen of the abstracts. We retrieved full texts all included abstracts. Two reviewers (MAS, NG) independently conducted the full text review, wherein any disagreements were resolved by consensus. We included studies if they were case reports of a single patient diagnosed with COVID-19 that were published online between January 1, 2020 to April 24, 2020. We excluded the following: reports with an unconfirmed diagnosis of COVID-19; non-primary studies (e.g. editorials without clinical data); studies with full texts that could not be obtained and/or are not available in English; studies without a digital object identifier (DOI); animal studies; and studies presenting clinical information for more than one patient.

## CARE Statement

The CARE checklist was initially developed in 2013 using a Delphi process in order to ensure COR for case reports(11). The checklist was updated in 2016 to include a fourteenth topic, making for a total of 31 checklist items(10). We used this version for our evaluation and identified the following sections as particularly relevant to clinical practice in COVID-19: patient information; diagnostic assessment; therapeutic intervention; and follow-up and outcomes.

**Data Extraction**

We extracted bibliographic data using a standardized form that included the following data: date of publication; and the number of authors on each paper. The print status of the article as journal pre-print, post-print or published was determined based on the article downloaded from the journal website. We determined whether the journal explicitly endorsed either CARE guidelines and/or the Enhancing the Quality and Transparency of Health Research (EQUATOR) network on the 'For Authors' sections of their webpage; and whether journals were members of the Committee on Publication Ethics (COPE) using the search function on the COPE website(20).

Two authors (MAS, NG) conducted the critical appraisal using the CARE checklist and rated each item as either "present" or "absent". A pilot data extraction was conducted on studies that were not included in the search. The two authors then independently reviewed each case report for CARE checklist items, following recommendations for CARE guidelines(10). The authors reviewed the full-texts downloaded from the journal website, in an approach designed to mimic that of the casual reader. All journal texts were downloaded as of April 24, 2020.

**Databases**



All data was obtained on May 3, 2020. For information on open access status, we used the Simple Query Tool from Unpaywall (Our Research, Vancouver, Canada), a publicly-accessible platform that indexes papers open access information(21). For citation count, we used institutional access to the Web of Science (Clarivate™, Philadelphia, USA)(22). For social media attention, we used Altmetric Explorer (Digital Science, London, UK), which tracks mentions of the publications across online sites and social media(23). For bibliometric information, we used institutional access to Ulrich's Periodicals Directory (ProQuest LLC, Ann Arbor, USA), a database that provides information on academic publications(24). For journal impact factor and total citation count, we used institutional access to the InCites Journal Citation Reports system (Clarivate™, Philadelphia, USA)(25).

## **Outcome measures**

The primary outcome was the overall COR score for case reports related to COVID-19, with a focus on clinically relevant items. Secondary outcomes included analysis that determined whether there was a change in overall COR score with time of publication, journal endorsement of CARE, open access status, and journal membership in COPE. We also determined whether there was a linear relationship between COR and citation count and between COR scores and social media attention.

## **Statistical Analysis**

1  
2  
3  
4  
5  
6  
7  
8  
9  
10  
11  
12  
13  
14  
15  
16  
17  
18  
19  
20  
21  
22  
23  
24  
25  
26  
27  
28  
29  
30  
31  
32  
33  
34  
35  
36  
37  
38  
39  
40  
41  
42  
43  
44  
45  
46  
47  
48  
49  
50  
51  
52  
53  
54  
55  
56  
57  
58  
59  
60

All statistical analyses were completed in SPSS version 25 (IBM, Armonk, NY). Descriptive statistics of mean with standard deviation (SD) and median with interquartile range (IQR) were used as appropriate. According to a previous study(12), the completeness of reporting (COR) score was calculated using the following equation:

**Equation 1.** *COR Score (%)*= [ $\sum$ *Present items*/ $\sum$ (31)]\*100

The mean COR score was calculated using assessments from both raters. To ensure transparency in reporting(26), we also calculated both a mean and median COR score for all items of the CARE statement and for each study section.

The normality of the distribution for the COR scores was assessed using the Shapiro-Wilk test and Q-Q plots where appropriate(27). Inter-rater agreement was assessed for each CARE item using proportion percentage agreement and for the overall COR scores using the intraclass correlation coefficient (ICC)<sub>2,1</sub> (two-way random-effect model for average measures [the average of 2 raters' scores]).

To evaluate a difference in the mean COR scores with the hypothesized threshold of 75%, we used a one sample t-test. To evaluate a difference in the mean COR scores with the variables of CARE endorsement, COPE membership, and open access status, we used an independent samples t-test. To evaluate a difference in the mean COR scores with the variables of print status (i.e. pre, post, published), we used a one-way analysis of variance (ANOVA) with independent samples t-tests for post hoc analysis.

To determine whether there was a linear relationship between mean COR scores with Attention Score and with article citation count, Pearson's correlation coefficient was used.

Effect size was measured using Cohen's *d*. All statistical tests used an  $\alpha$  of 0.05.

## RESULTS

### Study characteristics

Of the 195 studies found in our initial search, we included 96 case reports that were published in 67 different journals for quantitative analysis. The bibliographic characteristics of the included studies are summarized in **Table 1**. A more detailed summary for each study is provided in **Appendix B**.

**Table 1.** Bibliometric characteristics of included case reports

| Characteristic       |                                           | Values      |
|----------------------|-------------------------------------------|-------------|
| <b>Journal level</b> | Unique journal count ( <i>n</i> )         | 67          |
|                      | Open access journal, <i>n</i> (%)         | 20 (29.8%)  |
|                      | COPE membership, <i>n</i> (%)             | 42 (62.7%)  |
|                      | CARE or EQUATOR endorsement, <i>n</i> (%) | 18 (26.9%)  |
| <b>Article level</b> | Article Count                             | 96          |
|                      | Open access article, <i>n</i> (%)         | 92 (95.8 %) |

1  
2  
3  
4  
5  
6  
7  
8  
9  
10  
11  
12  
13  
14  
15  
16  
17  
18  
19  
20  
21  
22  
23  
24  
25  
26  
27  
28  
29  
30  
31  
32  
33  
34  
35  
36  
37  
38  
39  
40  
41  
42  
43  
44  
45  
46  
47  
48  
49  
50  
51  
52  
53  
54  
55  
56  
57  
58  
59  
60

|                                          |                |
|------------------------------------------|----------------|
| Number of authors, mean (SD)             | 7.1 (4.9)      |
| Citation count <sup>a</sup> , mean (SD)  | 3.4 (15.4)     |
| Attention Score <sup>a</sup> , mean (SD) | 259.3 (1111.7) |
| Print status <sup>b</sup> , <i>n</i> (%) |                |
| Pre-print                                | 2 (2.10%)      |
| Post-print                               | 20 (20.8%)     |
| Published                                | 74 (77.1%)     |

*COPE*, Committee on Publication Ethics; *CARE*, Case Report checklist and statements; *EQUATOR*, Enhancing the Quality and Transparency of Health Research.

*SD*, standard deviation

<sup>a</sup> Determined as of May 03, 2020

<sup>b</sup> Determined as of April 24, 2020

The included case reports were published between January 4, 2020 and April 23, 2020. A summary of the month of publication for the included case reports with corresponding mean COR score is provided in **Figure 1**.

**Figure 1. Search flow.** COVID-19, coronavirus 2019; DOI, digital object identifier

**Primary outcome**

The mean COR score for the two raters was 62.6% (standard deviation [SD]=15.5), which was significantly less than the hypothesized threshold of 75% ( $t_{95} = -7.8$ ,  $P < 0.001$ ). The ICC(2,1) of average measures for the overall COR score was 0.92 (95% confidence interval [95% CI]: 0.87-0.94), which indicates excellent agreement.

There was no one case report that included all of the 31 CARE checklist items (**Table 2**). The three clinically relevant items with the highest COR scores were: “Diagnostic methods” (median COR=98%); “Diagnostic reasoning” (median=95%); and “Types of intervention” (median COR=88%). The three clinically relevant items with the lowest COR scores were: “Diagnostic challenges” (median COR=16%); “Intervention adherence and tolerability” (median=20%); and “Adverse and unanticipated events” (median COR=28%).

**TABLE 2.** Completeness of reporting (COR) scores for each CARE topic and question

| Topic | Item | Question | Median | Mean |
|-------|------|----------|--------|------|
|-------|------|----------|--------|------|

1  
2  
3  
4  
5  
6  
7  
8  
9  
10  
11  
12  
13  
14  
15  
16  
17  
18  
19  
20  
21  
22  
23  
24  
25  
26  
27  
28  
29  
30  
31  
32  
33  
34  
35  
36  
37  
38  
39  
40  
41  
42  
43  
44  
45  
46  
47  
48  
49  
50  
51  
52  
53  
54  
55  
56  
57  
58  
59  
60

|                        |    |                                                                                                     | COR<br>per<br>topic<br>(%) | COR per<br>item (%) |
|------------------------|----|-----------------------------------------------------------------------------------------------------|----------------------------|---------------------|
| Title                  | 1  | The words “case report” should be in the title along with what is of greatest interest in this case | 34                         | 34                  |
| Keywords               | 2  | The key elements of this case in 2-5 key words                                                      | 52                         | 52                  |
| Abstract               | 3a | Introduction – what is unique about this case? What does it add to the medical literature?          | 59                         | 63                  |
|                        | 3b | The main symptoms of the patient and the important clinical findings                                |                            | 46                  |
|                        | 3c | The main diagnoses, therapeutics interventions, and outcomes                                        |                            | 57                  |
|                        | 3d | Conclusion – what were the main “take away” lessons from this case?                                 |                            | 60                  |
| Introduction           | 4  | Brief background summary of this case referencing the relevant medical literature                   | 76                         | 76                  |
| Patient<br>Information | 5a | Demographic information (such as age, gender, ethnicity, occupation)                                | 87                         | 100                 |
|                        | 5b | Main symptoms of the patient (chief complaints)                                                     |                            | 98                  |
|                        | 5c | Medical, family, and psychosocial history including comorbidities, and relevant genetic information |                            | 76                  |
|                        | 5d | Relevant past interventions and their outcomes                                                      |                            | 52                  |
| Clinical<br>Findings   | 6  | Describe the relevant physical examination (PE) findings                                            | 82                         | 82                  |
| Timeline               | 7  | Depict important milestones related to your diagnoses and interventions (table or figure)           | 46                         | 46                  |

|                     |     |                                                             |     |     |
|---------------------|-----|-------------------------------------------------------------|-----|-----|
| <b>Diagnostic</b>   | 8a  | Diagnostic methods (such as PE, laboratory testing,         | 59  | 98  |
| <b>Assessment</b>   |     | imaging, questionnaires)                                    |     |     |
|                     | 8b  | Diagnostic challenges (such as financial, language, or      |     | 16  |
|                     |     | cultural)                                                   |     |     |
|                     | 8c  | Diagnostic reasoning including other diagnoses considered   |     | 95  |
|                     | 8d  | Prognostic characteristics (such as staging in oncology)    |     | 23  |
|                     |     | where applicable                                            |     |     |
| <b>Therapeutic</b>  | 9a  | Types of intervention (such as pharmacologic, surgical,     | 67  | 88  |
| <b>Intervention</b> |     | preventive, self-care)                                      |     |     |
|                     | 9b  | Administration of intervention (such as dosage, strength,   |     | 67  |
|                     |     | duration)                                                   |     |     |
|                     | 9c  | Changes in intervention (with rationale)                    |     | 59  |
| <b>Follow-up</b>    | 10a | Clinician-assessed outcomes and, when appropriate,          | 52  | 85  |
| <b>and</b>          |     | patient-assessed outcomes                                   |     |     |
| <b>Outcomes</b>     |     |                                                             |     |     |
|                     | 10b | Important follow-up test results                            |     | 76  |
|                     | 10c | Intervention adherence and tolerability (how was this       |     | 20  |
|                     |     | assessed?)                                                  |     |     |
|                     | 10d | Adverse and unanticipated events                            |     | 28  |
| <b>Discussion</b>   | 11a | Discussion of the strengths and limitations in the          | 86  | 53  |
|                     |     | management of this case                                     |     |     |
|                     | 11b | Discussion of the relevant medical literature               |     | 86  |
|                     | 11c | The rationale for conclusions (including assessment of      |     | 85  |
|                     |     | possible causes)                                            |     |     |
|                     | 11d | The main “take-away” lessons of this case report            |     | 91  |
| <b>Patient</b>      | 12  | Did the patient share his or her perspective or experience? | 1.6 | 1.6 |
| <b>Perspective</b>  |     | (Include when appropriate)                                  |     |     |

1  
2  
3  
4  
5  
6  
7  
8  
9  
10  
11  
12  
13  
14  
15  
16  
17  
18  
19  
20  
21  
22  
23  
24  
25  
26  
27  
28  
29  
30  
31  
32  
33  
34  
35  
36  
37  
38  
39  
40  
41  
42  
43  
44  
45  
46  
47  
48  
49  
50  
51  
52  
53  
54  
55  
56  
57  
58  
59  
60

|             |    |                                                          |    |    |
|-------------|----|----------------------------------------------------------|----|----|
| Informed    | 13 | Did the patient give informed consent? Please provide if | 39 | 39 |
| Consent     |    | requested                                                |    |    |
| Additional  | 14 | Acknowledgement section; Competing interests; IRB        | 89 | 89 |
| Information |    | approval when required                                   |    |    |

**Secondary outcomes**

We found a significant difference in mean COR scores for articles published in the two-month period of January-February compared with March-April, where earlier published case reports possessed a lower mean COR score compared to those published later (54.1 vs. 64.1, respectively;  $t_{94} = -2.3$ ,  $P = 0.026$ ,  $d = 0.6$ ).

**Figure 2.** Number of case reports published on COVID-19 from the beginning of 2020 to the date of the search (April 24, 2020) with corresponding mean completeness of reporting (COR) scores. COR, completeness of reporting.

We did not find significant differences in mean COR scores for the following analyses: journals that endorsed CARE guidelines compared to those that did not (64.4 vs 59.1, respectively;  $t_{47.3} = -1.4$ ,  $P = 0.163$ ); open access articles compared to those that were not (62.5 vs 65.3, respectively;  $t_{94} = 0.4$ ,  $P = 0.725$ ); articles published in open access journals compared to those that were not (62.2 vs. 62.7, respectively;  $t_{94} = -0.1$ ,  $P = 0.884$ ); articles published in journals with COPE membership compared to those that were not (63.5 vs. 61.2, respectively;  $t_{94} = 0.7$ ,  $P = 0.486$ ); and for articles available as pre-print, post-print, and published (54.8 vs. 69.4 vs. 61.0, respectively;  $F_{2,95} = 2.7$ ,  $P = 0.074$ ).



There was no significant linear relationship in mean COR scores with Attention Score ( $R=0.038$ ,  $P=0.721$ ) or with article citation count ( $R= -0.031$ ,  $P=0.761$ ). There were 6 studies for which Attention score was not available.

## INTERPRETATION

We identified 96 case reports on COVID-19 published in 67 different journals from January to April, 2020. Overall, the completeness of reporting was poor, with a mean COR of 62.6%. No single case report contained all the items in CARE guidelines. Furthermore, the clinically relevant items that were most poorly reported pertained to diagnostic challenges, therapeutic adherence/tolerability and adverse/unanticipated events. Finally, mean COR scores significantly improved over the latter half of the four month period we assessed. No other factors significantly impacted COR and there was no correlation of COR with either social media attention or article citation count. This is the first known study to comprehensively investigate the quality of reporting for evidence related to COVID-19(9,17).

Although classically considered low quality evidence(4), case reports become critically important during the early stages of pandemics(6). During the 2009 H1N1 pandemic, for example, case reports and other observational studies were among the earliest types of evidence available to inform clinical practice and facilitate knowledge dissemination to the global community(5,28,29). Specifically, these case descriptions aided the early understanding of the disease(28), as they informed clinical presentation,

1  
2  
3  
4  
5  
6  
7  
8  
9  
10  
11  
12  
13  
14  
15  
16  
17  
18  
19  
20  
21  
22  
23  
24  
25  
26  
27  
28  
29  
30  
31  
32  
33  
34  
35  
36  
37  
38  
39  
40  
41  
42  
43  
44  
45  
46  
47  
48  
49  
50  
51  
52  
53  
54  
55  
56  
57  
58  
59  
60

epidemiological preferences and outcomes. Furthermore, case reports serve as the foundation for higher-quality follow-up studies with larger sample sizes(3). This is illustrated by a bibliometric analysis of literature from the Middle Eastern Respiratory syndrome (MERS) outbreak, which found that case reports were among the top 10 cited publications from this period(30). In short, case reporting is a highly flexible medium that can be strategically pivoted during disease outbreaks and it frequently forms the “first line of evidence”(31).

Our findings, however, demonstrate that this front line can be easily undermined with poor reporting. In particular, it is worrisome that COR scores were significantly lower in the period of January to February, when high-quality case reports would have provided substantial guidance on treatment decisions and research hypotheses(3,6). Furthermore, poor reporting in the clinically relevant areas of intervention adherence, tolerability, and adverse events exacerbates the concern around decision-making regarding unproven therapies in critically ill patients(3,6). The literature, however, shows that incomplete reporting is not unique to the current COVID-19 pandemic. A report by the World Health Organization (WHO) on the H1N1 pandemic(28), for example, found that important components of case records were incomplete, which negatively impacted the lines of communication.

We also found that COR did not correlate with either article citation or social media attention. One interpretation is that readers do not preferentially consider quality of reporting when citing or discussing case reports. As a result, we believe that ensuring

adequate reporting is best accomplished through endorsement of reporting guidelines by each journal. This has been demonstrated for more robust forms of evidence such as randomized controlled trials (RCT), where journal endorsement of Consolidated Standards of Reporting Trials (CONSORT) improved overall COR(32). In terms of case reports, one study found that endorsement of CARE guidelines among four high impact medical journals positively improved COR(12).

Journal endorsement alone, however, may prove insufficient. For RCTs, for example, reporting quality was still suboptimal even with CONSORT endorsement, with the authors suggesting that journals should implement stronger measures to ensure COR(32). We recommend that journals employ large scale adoption of standardized documentation to improve the completeness of case reporting(29). This approach lent itself especially well to pandemics in the case of registries, where calls for standardization of case report forms (CRFs) across registries during the early stages of the 2009 H1N1 pandemic improved their ability to support for future research(5), and were also shown to be globally feasible(33).

Our study has several limitations. First, we only included single-patient case reports, which restrict the generalizability of our findings to this specific type of study. Second, we excluded all studies with full texts that were not published in English, which may have introduced a language bias. Third, CARE guidelines are intended for clinical reports, which may limit their generalizability to imaging reports and correspondence. Finally, the use of CARE guidelines to assess COR, while previously reported(12–

1  
2  
3  
4  
5  
6  
7  
8  
9  
10  
11  
12  
13  
14  
15  
16  
17  
18  
19  
20  
21  
22  
23  
24  
25  
26  
27  
28  
29  
30  
31  
32  
33  
34  
35  
36  
37  
38  
39  
40  
41  
42  
43  
44  
45  
46  
47  
48  
49  
50  
51  
52  
53  
54  
55  
56  
57  
58  
59  
60

14,16), likely imputed a degree of subjectivity, as the guidelines do not specify the depth or explicitness of completeness required for each topic. Nevertheless, the overall inter-rater agreement of the COR scores was high, suggesting that this approach has good reliability.

In summary, the overall reporting quality of COVID-19 case reports was poor. At a systemic level, we recommend the wide scale adoption of a common standard for case reporting by journals. Future studies should comprehensively investigate the quality of reporting among other types of evidence for COVID-19, including other observational studies, randomized controlled trials and systematic reviews.

**ACKNOWLEDGEMENTS**

We thank Altmetric for providing this study’s data free of charge for research purposes. We also acknowledge the care provided by all healthcare workers on the frontlines of this pandemic.

**DATA SHARING STATEMENT**

Study data is available upon request.

**REFERENCES**

1. Murad MH, Sultan S, Haffar S, Bazerbach F. Methodological quality and synthesis of case series and case reports. Evid Based Med. 2018;23(2):60–3.

2. Murad MH, Asi N, Alsawas M, Alahdab F. New evidence pyramid. *Evid Based Med.* 2016;21(4):125–7.
3. Vandenbroucke J. In Defense of Case Reports and Case Series. *Ann Intern Med.* 2001;134:330–4.
4. Nissen T, Wynn R. The recent history of the clinical case report: a narrative review. *JRSM Short Rep.* 2012;3(12):1–5.
5. Fowler RA, Webb SAR, Rowan KM, Sprung CL, Thompson BT, Randolph AG, et al. Early observational research and registries during the 2009–2010 influenza A pandemic. *Crit Care Med.* 2013;38(40):e120–32.
6. Wiwanitkit V. The usefulness of case reports in managing emerging infectious disease. *J Med Case Rep.* 2011;5:1–2.
7. Peyrin-Biroulet L. Will the quality of research remain the same during the COVID-19 pandemic? *Clin Gastroenterol Hepatol.* 2020;19–22.
8. London AJ, Kimmelman J. Against pandemic research exceptionalism. *Science* (80- ). 2020;368(6490):eabc1731.
9. Knottnerus JA, Tugwell P. Methodological challenges in studying the COVID-19 pandemic crisis. *J Clin Epidemiol.* 2020;121:A5–7.
10. Riley DS, Barber MS, Kienle GS, Aronson JK, von Schoen-Angerer T, Tugwell P, et al. CARE guidelines for case reports: explanation and elaboration document. *J Clin Epidemiol.* 2017;89:218–35.
11. Gagnier JJ, Kienle G, Altman DG, Moher D, Sox H, Riley D, et al. The CARE guidelines: Consensus-based clinical case reporting guideline development. *BMJ Case Rep.* 2013;1–4.

12. Calvache JA, Vera-Montoya M, Ordoñez D, Hernandez A V., Altman D, Moher D. Completeness of reporting of case reports in high-impact medical journals. *Eur J Clin Invest.* 2020;(November 2019):1–10.

13. Kim J, Eom YJ, Lee YS, Nam D, Chae Y. The Current Status of Quality of Reporting in Acupuncture Treatment Case Reports: An Analysis of the Core Journal in Korea. *Evidence-based Complement Altern Med.* 2017;2017.

14. Ravi R, Mulkalwar A, Thatte UM, Gogtay NJ. Medical case reports published in PubMed-indexed Indian journals in 2015: Adherence to 2013 CARE guidelines. *Indian J Med Ethics.* 2018;3(3):192–5.

15. An G hui, Tang X ting, Chen Y long, Zhao Y. Reporting characteristics of case reports of acupuncture therapy with CARE guidelines. *Chin J Integr Med.* 2018;24(1):56–63.

16. Eldawlatly A, Alsultan D, Al Dammas F, Ahmed A, Al Andas R, Zahoor B. Adaptation of CARE (CAse REport) guidelines on published case reports in the Saudi Journal of Anesthesia. *Saudi J Anesth.* 2018;12(3):446–9.

17. Borges do Nascimento IJ, Cacic N, Abdulazeem HM, von Groote TC, Jayarajah U, Weerasekara I, et al. Novel Coronavirus Infection (COVID-19) in Humans: A Scoping Review and Meta-Analysis. *J Clin Med.* 2020;9(4):941.

18. Murad MH, Wang Z. Guidelines for reporting meta-epidemiological methodology research. *Evid Based Med.* 2017;22(4):139–42.

19. Prevention C for DC and. COVID-19 PubMed Search Alert [Internet]. 2020 [cited 2020 Apr 23]. Available from: <https://www.cdc.gov/library/researchguides/2019novelcoronavirus/pubmedsearch>

1  
2  
3 alert.html  
4

- 5  
6 20. Committee on Publication Ethics (COPE) [Internet]. [cited 2020 Apr 23]. Available  
7 from: <https://publicationethics.org/>  
8
- 9  
10 21. Unpaywall. Simple Query Tool [Internet]. [cited 2019 Jul 6]. Available from:  
11 <https://unpaywall.org/products/simple-query-tool>  
12
- 13  
14 22. Analytics C. Web of Science [Internet]. [cited 2020 Apr 24]. Available from:  
15 <https://login.webofknowledge.com>  
16
- 17  
18 23. Almetric. Almetric Explorer [Internet]. Available from:  
19 <https://www.altmetric.com/explorer/login>  
20
- 21  
22 24. Ulrich's. Ulrich's Periodicals Directory [Internet]. Available from:  
23 <https://www.proquest.com/products-services/Ulrichsweb.html>  
24
- 25  
26 25. InCites Journal Citation [Internet]. Available from: <https://incites.clarivate.com/>  
27
- 28  
29 26. Puljak L. Reporting checklists are used as measurement tools for assessing  
30 quality, even though they have not been validated for such use. *Trials*.  
31 2019;20(1):19–20.  
32
- 33  
34 27. Ghasemi A, Zahediasl S. Normality tests for statistical analysis: A guide for non-  
35 statisticians. *Int J Endocrinol Metab*. 2012;10(2):486–9.  
36
- 37  
38 28. Williams S, Fitzner J, Merianos A, Mounts A. The challenges of global case  
39 reporting during pandemic A(H1N1) 2009. *Bull World Health Organ*.  
40 2014;92(1):60–7.  
41
- 42  
43 29. Webb SA, Nichol AD. Bending the pandemic curve: Improving decision-making  
44 with clinical research. *Crit Care Med*. 2018;46(3):442–6.  
45
- 46  
47 30. Zyoud SH. Global research trends of Middle East respiratory syndrome  
48  
49  
50  
51  
52  
53  
54  
55  
56  
57  
58  
59  
60

1  
2  
3 coronavirus: A bibliometric analysis. BMC Infect Dis. 2016;16(1):1–7.  
4  
5  
6 31. Jenicek M. Clinical case reporting in evidence-based medicine. 2nd Ed. London;  
7  
8 2001.  
9  
10 32. Turner L, Shamseer L, Altman DG, Schulz KF, Moher D. Does use of the  
11  
12 CONSORT Statement impact the completeness of reporting of randomised  
13  
14 controlled trials published in medical journals? A Cochrane reviewa. Syst Rev.  
15  
16 2012;1(60):1–7.  
17  
18  
19 33. Murthy S. Using research to prepare for outbreaks of severe acute respiratory  
20  
21 infection. BMJ Glob Heal. 2019;4(1):1–7.  
22  
23  
24  
25  
26  
27  
28  
29  
30  
31  
32  
33  
34  
35  
36  
37  
38  
39  
40  
41  
42  
43  
44  
45  
46  
47  
48  
49  
50  
51  
52  
53  
54  
55  
56  
57  
58  
59  
60



# APPENDIX

## Quality of COVID-19 Case Reports

### TABLE OF CONTENTS

|                                                                          |   |
|--------------------------------------------------------------------------|---|
| <b>Appendix A.</b> Search strategy.....                                  | 2 |
| <b>Appendix B.</b> Descriptive information of the included articles..... | 3 |

1  
2  
3  
4  
5  
6  
7  
8  
9  
10  
11  
12  
13  
14  
15  
16  
17  
18  
19  
20  
21  
22  
23  
24  
25  
26  
27  
28  
29  
30  
31  
32  
33  
34  
35  
36  
37  
38  
39  
40  
41  
42  
43  
44  
45  
46  
47

**Appendix A. Search strategy**

((coronavirus OR "corona virus" OR coronaviridae OR coronaviridae OR betacoronavirus OR covid19 OR "covid 19" OR ncov OR "CoV 2" OR CoV2 OR sarscov2 OR 2019nCoV OR "novel CoV" OR "wuhan virus") OR ((wuhan OR hubei OR huaian) AND ("severe acute respiratory" OR pneumonia) AND (outbreak)) OR "Coronavirus"[Mesh] OR "Coronavirus Infections"[Mesh] OR "COVID-19"[Supplementary Concept] OR "severe acute respiratory syndrome coronavirus 2"[Supplementary Concept] OR "Betacoronavirus"[Mesh]) AND case report

Confidential

**Appendix B. Descriptive information of the included articles**

| <b>First Author<br/>(Last name,<br/>First initials)</b> | <b>Article Title</b>                                                                                                                                    | <b>Corresponding<br/>Author's<br/>Country</b> | <b>Journal</b>                                              | <b>Journal<br/>Country</b> | <b>Article<br/>Open<br/>Access<br/>Status</b> | <b>Print<br/>Status</b> |
|---------------------------------------------------------|---------------------------------------------------------------------------------------------------------------------------------------------------------|-----------------------------------------------|-------------------------------------------------------------|----------------------------|-----------------------------------------------|-------------------------|
| <b>Adair, LB</b>                                        | Covid-19 pneumonia in a kidney transplant recipient successfully treated with Tocilizumab and Hydroxychloroquine.                                       | USA                                           | Radiology case reports                                      | USA                        | Yes                                           | Published               |
| <b>Adams, E</b>                                         | COVID-19 infection and treatment with hydroxychloroquine cause severe haemolysis crisis in a patient with glucose-6-phosphate dehydrogenase deficiency. | USA                                           | Journal of vascular surgery cases and innovative techniques | Netherlands                | Yes                                           | Post-print              |
| <b>An, P</b>                                            | Achieving a Popliteal Venous Access for RRT in Critically Ill COVID-19 Patient in Prone position.                                                       | China                                         | The Balkan Medical Journal                                  | Turkey                     | Yes                                           | Published               |
| <b>Arpali, E</b>                                        | COVID-19 and intracerebral haemorrhage: causative or coincidental?                                                                                      | Turkey                                        | Transplant Infectious Disease                               | USA                        | No                                            | Post-print              |
| <b>Asadollahi-Amin, A</b>                               | A man in his nineties with fever and dry cough.                                                                                                         | Iran                                          | Tropical Medicine and Infectious Disease                    | Switzerland                | Yes                                           | Published               |
| <b>Bartiromo, M</b>                                     | An Atypical Presentation of Novel Coronavirus Disease 2019 (COVID-19).                                                                                  | Italy                                         | Transplant Infectious Disease                               | USA                        | Yes                                           | Post-print              |
| <b>Beauverd, Y</b>                                      | A Case of SARS-CoV-2-pneumonia with successful antiviral therapy in a 77-year-old male with heart transplant.                                           | Switzerland                                   | European journal of haematology                             | Denmark                    | Yes                                           | Post-print              |
| <b>Bemtgen, X</b>                                       | A sporadic COVID-19 pneumonia treated with extracorporeal membrane oxygenation in Tokyo, Japan: A case report.                                          | Germany                                       | ASAIO Journal                                               | USA                        | Yes                                           | Post-print              |
| <b>Bettari, L</b>                                       | COVID-19 in a MS patient treated with ocrelizumab: does immunosuppression have a protective role?                                                       | Italy                                         | JACC: Case Reports                                          | USA                        | Yes                                           | Published               |
| <b>Borén, HK</b>                                        | Case Report: The Importance of Novel Coronavirus Disease (COVID-19) and Coinfection with Other Respiratory Pathogens in the Current Pandemic.           | Norway                                        | Tidsskrift for den Norske laegeforening                     | Norway                     | Yes                                           | Published               |

1  
2  
3  
4  
5  
6  
7  
8  
9  
10  
11  
12  
13  
14  
15  
16  
17  
18  
19  
20  
21  
22  
23  
24  
25  
26  
27  
28  
29  
30  
31  
32  
33  
34  
35  
36  
37  
38  
39  
40  
41  
42  
43  
44  
45  
46  
47

| First Author<br>(Last name,<br>First initials) | Article Title                                                                                                                     | Corresponding<br>Author's<br>Country | Journal                                                  | Journal<br>Country | Article<br>Open<br>Access<br>Status | Print<br>Status |
|------------------------------------------------|-----------------------------------------------------------------------------------------------------------------------------------|--------------------------------------|----------------------------------------------------------|--------------------|-------------------------------------|-----------------|
| <b>Buonsenso, D</b>                            | Case Report: Hepatotoxicity Associated with the Use of Hydroxychloroquine in a Patient with Novel Coronavirus Disease (COVID-19). | Italy                                | European Review for Medical and Pharmacological Sciences | Italy              | No                                  | Published       |
| <b>Bussalino, E</b>                            | Case Report: The First Case of Novel Coronavirus Disease (COVID-19) in Bhutan.                                                    | Italy                                | American Journal of Transplantation                      | USA                | Yes                                 | Post-print      |
| <b>Canarutto, D</b>                            | COVID-19 complicated by Acute Pulmonary Embolism and Right-Sided Heart Failure.                                                   | Italy                                | Pediatric Pulmonology                                    | USA                | Yes                                 | Published       |
| <b>Casey, K</b>                                | Morbilloform Exanthem Associated with COVID-19.                                                                                   | USA                                  | The American journal of emergency medicine               | USA                | Yes                                 | Published       |
| <b>Chang, D</b>                                | Guillain-Barré Syndrome associated with SARS-CoV-2 infection.                                                                     | USA                                  | Heart Rhythm Case Reports                                | Netherlands        | Yes                                 | Published       |
| <b>Chau, VQ</b>                                | Veno-venous extracorporeal membrane oxygenation for severe pneumonia: COVID-19 case in Japan.                                     | USA                                  | JACC: Case Reports                                       | USA                | Yes                                 | Published       |
| <b>Chen, D</b>                                 | Chest CT Findings of Early and Progressive Phase COVID-19 Infection from a US Patient.                                            | China                                | International Journal of Infectious Diseases             | UK                 | Yes                                 | Published       |
| <b>Cheng, SC</b>                               | Guillain Barre syndrome associated with COVID-19 infection: A case report.                                                        | Taiwan                               | Journal of the Formosan Medical Association              | Hong Kong          | Yes                                 | Published       |
| <b>Deng, Z</b>                                 | COVID-19 pneumonia with hemoptysis: Acute segmental pulmonary emboli associated with novel coronavirus infection.                 | China                                | Journal of Medical Virology                              | USA                | No                                  | Published       |
| <b>Duan, YN</b>                                | Documented early circulation of Coronavirus Disease 2019 (COVID-19) in Florida, USA, since February 2020.                         | China                                | Radiology                                                | USA                | Yes                                 | Published       |

| First Author<br>(Last name,<br>First initials) | Article Title                                                                                                                                       | Corresponding<br>Author's<br>Country | Journal                                               | Journal<br>Country | Article<br>Open<br>Access<br>Status | Print<br>Status |
|------------------------------------------------|-----------------------------------------------------------------------------------------------------------------------------------------------------|--------------------------------------|-------------------------------------------------------|--------------------|-------------------------------------|-----------------|
| <b>El Kassas, M</b>                            | Venous thrombosis and arteriosclerosis obliterans of lower extremities in a very severe patient with 2019 novel coronavirus disease: a case report. | Egypt                                | Digestive Endoscopy                                   | Australia          | Yes                                 | Post-print      |
| <b>Fabre, O</b>                                | Novel Coronavirus Disease 2019 in a Patient on Durable Left Ventricular Assist Device Support.                                                      | France                               | The Annals of Thoracic Surgery                        | USA                | Yes                                 | Pre-print       |
| <b>Falcão, MB</b>                              | Severe Acute Proximal Pulmonary Embolism and COVID-19: A Word of Caution.                                                                           | Brazil                               | The American journal of tropical medicine and hygiene | USA                | Yes                                 | Published       |
| <b>Fang, X</b>                                 | A case of COVID-19 patient with the diarrhea as initial symptom and literature review.                                                              | China                                | QJM An International Journal of Medicine              | UK                 | Yes                                 | Published       |
| <b>Feng, H</b>                                 | First successful treatment of COVID-19 induced refractory cardiogenic plus vasoplegic shock by combination of pVAD and ECMO - a case report.        | China                                | Japanese Journal of Radiology                         | Japan              | Yes                                 | Published       |
| <b>Fontana, F</b>                              | A COVID-19 Patient Who Underwent Endonasal Endoscopic Pituitary Adenoma Resection: A Case Report.                                                   | Italy                                | American Journal of Transplantation                   | USA                | Yes                                 | Post-print      |
| <b>Fu, D</b>                                   | Case Report: A Kidney Transplant Patient with Mild COVID-19.                                                                                        | China                                | Nephron                                               | Switzerland        | Yes                                 | Published       |
| <b>Guillen, E</b>                              | A case of a readmitted patient who recovered from COVID-19 in Chengdu, China.                                                                       | Spain                                | American Journal of Transplantation                   | USA                | Yes                                 | Published       |
| <b>Hamer, OW</b>                               | Exploring Personal Protection During High-Risk PCI in a COVID-19 Patient: Impella CP Mechanical Support During ULMCA Bifurcation Stenting.          | Germany                              | Thieme Röfo                                           | Germany            | Yes                                 | Published       |
| <b>Han, X</b>                                  | The Imperfect Cytokine Storm: Severe COVID-19 with ARDS in Patient on Durable LVAD Support.                                                         | China                                | Journal of Thoracic Imaging                           | USA                | Yes                                 | Published       |
| <b>Hase, R</b>                                 | Coronavirus Disease 2019 (COVID-19) Pneumonia in a Hemodialysis Patient.                                                                            | Japan                                | Infectious Diseases                                   | UK                 | Yes                                 | Published       |

1  
2  
3  
4  
5  
6  
7  
8  
9  
10  
11  
12  
13  
14  
15  
16  
17  
18  
19  
20  
21  
22  
23  
24  
25  
26  
27  
28  
29  
30  
31  
32  
33  
34  
35  
36  
37  
38  
39  
40  
41  
42  
43  
44  
45  
46  
47

| First Author<br>(Last name,<br>First initials) | Article Title                                                                                                                 | Corresponding<br>Author's<br>Country | Journal                                               | Journal<br>Country | Article<br>Open<br>Access<br>Status | Print<br>Status |
|------------------------------------------------|-------------------------------------------------------------------------------------------------------------------------------|--------------------------------------|-------------------------------------------------------|--------------------|-------------------------------------|-----------------|
| Hillaker, E                                    | Collapsing Glomerulopathy in a Patient With Coronavirus Disease 2019 (COVID-19).                                              | USA                                  | Pharmacotherapy                                       | USA                | Yes                                 | Post-print      |
| Holshue, ML                                    | COVID-19 Infection Unmasking Brugada Syndrome.                                                                                | USA                                  | The New England Journal of Medicine                   | USA                | Yes                                 | Published       |
| Hosoda, T                                      | Severe Pneumonia Due to SARS-CoV-2 and Respiratory Syncytial Virus Infection: A Case Report.                                  | Japan                                | Infection Control & Hospital Epidemiology             | USA                | Yes                                 | Published       |
| Huang, JF                                      | Emergency endoscopic variceal band ligation in a COVID-19 patient presented with hematemesis while on mechanical ventilation. | China                                | American Journal of Transplantation                   | USA                | Yes                                 | Post-print      |
| Inciardi, RM                                   | A novel presentation of COVID-19 via community acquired infection.                                                            | Italy                                | JAMA Cardiology                                       | USA                | Yes                                 | Published       |
| Jansen, JH                                     | Breadth of concomitant immune responses prior to patient recovery: a case report of non-severe COVID-19.                      | USA                                  | Visual Journal of Emergency Medicine                  | USA                | Yes                                 | Published       |
| Jin, XH                                        | Immunosuppressive therapy maintenance in a kidney transplant recipient SARS-CoV-2 pneumonia: a case report.                   | China                                | The Lancet Hematology                                 | UK                 | Yes                                 | Published       |
| Kamali Aghdam, M                               | Delayed Initiation of Remdesivir in a COVID-19 Positive Patient.                                                              | Iran                                 | Infectious Diseases                                   | UK                 | Yes                                 | Published       |
| Khaddour, K                                    | Threatening drug-drug interaction in a kidney transplant patient with Coronavirus Disease 2019 (COVID-19).                    | USA                                  | The American journal of tropical medicine and hygiene | USA                | Yes                                 | Published       |
| Kim, J                                         | Fatal outcome in a liver transplant recipient with COVID-19.                                                                  | USA                                  | The American Journal of Emergency Medicine            | USA                | Yes                                 | Published       |
| Kim, JY                                        | Novel Coronavirus (SARS-CoV-2) Infection in A Renal Transplant Recipient: Case Report.                                        | China                                | Journal of Korean Medical Science                     | Korea              | Yes                                 | Published       |
| Larsen, CP                                     | First case of COVID-19 complicated with fulminant myocarditis: a case report and insights.                                    | USA                                  | Kidney International Reports                          | USA                | Yes                                 | Published       |

| First Author<br>(Last name,<br>First initials) | Article Title                                                                                                 | Corresponding<br>Author's<br>Country | Journal                                               | Journal<br>Country | Article<br>Open<br>Access<br>Status | Print<br>Status |
|------------------------------------------------|---------------------------------------------------------------------------------------------------------------|--------------------------------------|-------------------------------------------------------|--------------------|-------------------------------------|-----------------|
| <b>Lei, J</b>                                  | Myocardial localization of coronavirus in COVID-19 cardiogenic shock.                                         | China                                | Radiology                                             | USA                | Yes                                 | Published       |
| <b>LeVine, S</b>                               | Abdominal and testicular pain: An atypical presentation of COVID-19.                                          | Bhutan                               | The American journal of tropical medicine and hygiene | USA                | Yes                                 | Published       |
| <b>Li, XJ</b>                                  | Lung Involvement Found on Chest CT Scan in a Pre-Symptomatic Person with SARS-CoV-2 Infection: A Case Report. | China                                | Critical Care                                         | USA                | Yes                                 | Published       |
| <b>Lim, J</b>                                  | Successful treatment of COVID-19 using extracorporeal membrane oxygenation, a case report.                    | Republic of Korea                    | Journal of Korean Medical Science                     | Korea              | Yes                                 | Published       |
| <b>Lin, C</b>                                  | Chest radiography and computed tomography findings from a Brazilian patient with COVID-19 pneumonia.          | China                                | Clinical Imaging                                      | USA                | Yes                                 | Published       |
| <b>Lin, J</b>                                  | A case report of COVID-19 with false negative RT-PCR test: necessity of chest CT.                             | China                                | Pediatric Pulmonology                                 | USA                | Yes                                 | Published       |
| <b>Liu, B</b>                                  | A first case of meningitis/encephalitis associated with SARS-Coronavirus-2.                                   | China                                | American Journal of Transplantation                   | USA                | Yes                                 | Published       |
| <b>Liu, P</b>                                  | COVID-19 infection in a paucisymptomatic infant: Raising the index of suspicion in epidemic settings.         | China                                | Radiology                                             | USA                | Yes                                 | Published       |
| <b>Lv, DF</b>                                  | Tocilizumab, an anti-IL6 receptor antibody, to treat Covid-19-related respiratory failure: a case report.     | China                                | Clinica Chimica Acta                                  | Netherlands        | Yes                                 | Published       |
| <b>Mathies, D</b>                              | The isolation period should be longer: Lesson from a child infected with SARS-CoV-2 in Chongqing, China.      | Germany                              | American journal of transplantation                   | USA                | Yes                                 | Post-print      |
| <b>Michot, JM</b>                              | Successful treatment of severe COVID-19 pneumonia in a liver transplant recipient.                            | France                               | Annals of Oncology                                    | UK; Netherlands    | Yes                                 | Post-print      |
| <b>Miglietta, A</b>                            | SARS Cov2 infection in a renal transplanted patient. A case report.                                           | Italy                                | Journal of public health                              | UK                 | Yes                                 | Published       |

1  
2  
3  
4  
5  
6  
7  
8  
9  
10  
11  
12  
13  
14  
15  
16  
17  
18  
19  
20  
21  
22  
23  
24  
25  
26  
27  
28  
29  
30  
31  
32  
33  
34  
35  
36  
37  
38  
39  
40  
41  
42  
43  
44  
45  
46  
47

| First Author<br>(Last name,<br>First initials) | Article Title                                                                                                                     | Corresponding<br>Author's<br>Country | Journal                                              | Journal<br>Country | Article<br>Open<br>Access<br>Status | Print<br>Status |
|------------------------------------------------|-----------------------------------------------------------------------------------------------------------------------------------|--------------------------------------|------------------------------------------------------|--------------------|-------------------------------------|-----------------|
| Mihai, C                                       | First case of COVID-19 in a patient with multiple myeloma successfully treated with tocilizumab.                                  | Switzerland                          | BMJ Annals of the Rheumatic Diseases                 | UK                 | Yes                                 | Published       |
| Moreira, BL                                    | COVID-19 in a patient with systemic sclerosis treated with tocilizumab for SSc-ILD.                                               | Brazil                               | Revista da Sociedade Brasileira de Medicina Tropical | Brazil             | Yes                                 | Published       |
| Moriguchi, T                                   | Gargle lavage as a safe and sensitive alternative to swab samples to diagnose COVID-19: a case report in Japan.                   | Japan                                | International Journal of Infectious Diseases         | UK                 | Yes                                 | Published       |
| Najarian, DJ                                   | Case Report: Walking Pneumonia in Novel Coronavirus Disease (COVID-19): Mild Symptoms with Marked Abnormalities on Chest Imaging. | USA                                  | JAAD case reports                                    | Netherlands        | Yes                                 | Post-print      |
| Nakamura, K                                    | A case of imported COVID-19 diagnosed by PCR-positive lower respiratory specimen but with PCR-negative throat swabs.              | Japan                                | Journal of infection and chemotherapy                | Japan              | Yes                                 | Published       |
| Ning, L                                        | Novel coronavirus in a 15-day-old neonate with clinical signs of sepsis, a case report.                                           | China                                | American Journal of Transplantation                  | USA                | Yes                                 | Post-print      |
| Novi, G                                        | Dynamic change process of target genes by RT-PCR testing of SARS-Cov-2 during the course of a Coronavirus Disease 2019 patient.   | Italy                                | Multiple sclerosis and related disorders             | Netherlands        | Yes                                 | Published       |
| Park, JY                                       | Diagnosis and treatment of an acute severe pneumonia patient with COVID-19: Case report.                                          | South Korea                          | Journal of Korean Medical Science                    | Korea              | Yes                                 | Published       |
| Pongpirul, WA                                  | COVID-19 Infection in a Patient with End-Stage Kidney Disease.                                                                    | Thailand                             | The New England Journal of Medicine                  | USA                | Yes                                 | Published       |
| Saito, M                                       | COVID-19 in a patient with chronic lymphocytic leukaemia.                                                                         | Japan                                | Clinical Infectious Diseases                         | USA                | Yes                                 | Post-print      |
| Sedaghat, Z                                    | Cardiac Involvement in a Patient With Coronavirus Disease 2019 (COVID-19).                                                        | Iran                                 | Journal of clinical neuroscience                     | UK                 | Yes                                 | Published       |



| First Author<br>(Last name,<br>First initials) | Article Title                                                                                                                                         | Corresponding<br>Author's<br>Country | Journal                                               | Journal<br>Country | Article<br>Open<br>Access<br>Status | Print<br>Status |
|------------------------------------------------|-------------------------------------------------------------------------------------------------------------------------------------------------------|--------------------------------------|-------------------------------------------------------|--------------------|-------------------------------------|-----------------|
| <b>Seminari, E</b>                             | CT morphology of COVID-19: Case report and review of literature.                                                                                      | Italy                                | American Journal of Transplantation                   | USA                | Yes                                 | Post-print      |
| <b>Sharifi-Razavi, A</b>                       | Mediastinal Emphysema, Giant Bulla, and Pneumothorax Developed during the Course of COVID-19 Pneumonia.                                               | Iran                                 | New microbes and new infections                       | UK                 | Yes                                 | Published       |
| <b>Shi, B</b>                                  | Case report of COVID-19 in a kidney transplant recipient: Does immunosuppression alter the clinical presentation?                                     | China                                | Clinical Pediatrics                                   | USA                | Yes                                 | Published       |
| <b>Shi, F</b>                                  | Point-of-Care Lung Ultrasound findings in novel coronavirus disease-19 pneumoniae: a case report and potential applications during COVID-19 outbreak. | China                                | Korean Journal of Radiology                           | Korea              | Yes                                 | Published       |
| <b>Shi, H</b>                                  | First Pediatric Case of Coronavirus Disease 2019 in Korea.                                                                                            | China                                | Radiology                                             | USA                | Yes                                 | Published       |
| <b>Silverstein, WK</b>                         | CT image of novel coronavirus pneumonia: a case report.                                                                                               | Canada                               | The Lancet                                            | UK                 | Yes                                 | Published       |
| <b>Singh, R</b>                                | SARS-CoV-2 enterocolitis with persisting to excrete the virus for approximately two weeks after recovering from diarrhea: A case report.              | USA                                  | Journal of cardiac failure                            | USA                | Yes                                 | Post-print      |
| <b>Singhania, N</b>                            | Successful recovery of COVID-19 pneumonia in a renal transplant recipient with long-term immunosuppression.                                           | USA                                  | The American journal of medicine                      | USA                | Yes                                 | Pre-print       |
| <b>Sivakorn, C</b>                             | 2019 Novel Coronavirus (COVID-19) Pneumonia with Hemoptysis as the Initial Symptom: CT and Clinical Features.                                         | Thailand                             | The American Journal of Tropical Medicine and Hygiene | USA                | Yes                                 | Post-print      |
| <b>Sun, R</b>                                  | A Diabetic Patient With 2019-nCoV (COVID-19) Infection Who Recovered and Was Discharged From Hospital.                                                | China                                | Korean Journal of Radiology                           | Korea              | Yes                                 | Published       |
| <b>Tang, B</b>                                 | COVID-19 with spontaneous pneumomediastinum.                                                                                                          | China                                | Kidney Medicine                                       | Netherlands        | Yes                                 | Published       |

1  
2  
3  
4  
5  
6  
7  
8  
9  
10  
11  
12  
13  
14  
15  
16  
17  
18  
19  
20  
21  
22  
23  
24  
25  
26  
27  
28  
29  
30  
31  
32  
33  
34  
35  
36  
37  
38  
39  
40  
41  
42  
43  
44  
45  
46  
47

| First Author<br>(Last name,<br>First initials) | Article Title                                                                                                                                                                                                                       | Corresponding<br>Author's<br>Country | Journal                                                       | Journal<br>Country | Article<br>Open<br>Access<br>Status | Print<br>Status |
|------------------------------------------------|-------------------------------------------------------------------------------------------------------------------------------------------------------------------------------------------------------------------------------------|--------------------------------------|---------------------------------------------------------------|--------------------|-------------------------------------|-----------------|
| Taniguchi, H                                   | CT Manifestations of Novel<br>Coronavirus Pneumonia: A Case<br>Report                                                                                                                                                               | Japan                                | Acute medicine &<br>surgery                                   | USA                | Yes                                 | Published       |
| Tavazzi, G                                     | Recurrence of positive SARS-CoV-2<br>RNA in COVID-19: A case report.                                                                                                                                                                | Italy                                | European Journal of<br>Heart Failure                          | UK                 | Yes                                 | Published       |
| Thevarajan, I                                  | Imaging changes in severe COVID-19<br>pneumonia.                                                                                                                                                                                    | Australia                            | Nature Medicine                                               | USA                | Yes                                 | Published       |
| Ullah, W                                       | Asymptomatic novel coronavirus<br>pneumonia patient outside Wuhan:<br>The value of CT images in the course<br>of the disease.                                                                                                       | USA                                  | JACC. Case reports                                            | USA                | Yes                                 | Post-print      |
| Van Cuong, L                                   | First case of Coronavirus Disease<br>2019 (COVID-19) pneumonia in<br>Taiwan.                                                                                                                                                        | Japan                                | The Lancet<br>Infectious Diseases                             | UK                 | Yes                                 | Published       |
| Virani, A                                      | 2019 Novel Coronavirus (COVID-19)<br>Pneumonia: Serial Computed<br>Tomography Findings.                                                                                                                                             | USA                                  | IDCases                                                       | Netherlands        | Yes                                 | Published       |
| Wei, J                                         | The first Vietnamese case of COVID-<br>19 acquired from China.                                                                                                                                                                      | China                                | Korean Journal of<br>Radiology                                | Korea              | Yes                                 | Published       |
| Wu, F                                          | Pathological findings of COVID-19<br>associated with acute respiratory<br>distress syndrome.                                                                                                                                        | China                                | Nature                                                        | UK                 | Yes                                 | Published       |
| Xu, Z                                          | Changes of CT findings in a 2019<br>novel coronavirus (2019-nCoV)<br>pneumonia patient.                                                                                                                                             | China                                | The Lancet                                                    | UK                 | Yes                                 | Published       |
| Yang, X                                        | First imported case of 2019 novel<br>coronavirus in Canada, presenting as<br>mild pneumonia.                                                                                                                                        | China                                | Clinics and Research<br>in Hepatology and<br>Gastroenterology | France             | Yes                                 | Published       |
| Zeng, JH                                       | Case of the Index Patient Who Caused<br>Tertiary Transmission of COVID-19<br>Infection in Korea: the Application of<br>Lopinavir/Ritonavir for the Treatment of<br>COVID-19 Infected Pneumonia<br>Monitored by Quantitative RT-PCR. | China                                | Infection                                                     | Germany            | Yes                                 | Post-print      |

| First Author<br>(Last name,<br>First initials) | Article Title                                                                                                                                        | Corresponding<br>Author's<br>Country | Journal                                                  | Journal<br>Country | Article<br>Open<br>Access<br>Status | Print<br>Status |
|------------------------------------------------|------------------------------------------------------------------------------------------------------------------------------------------------------|--------------------------------------|----------------------------------------------------------|--------------------|-------------------------------------|-----------------|
| <b>Zhan, WQ</b>                                | Journey of a Thai Taxi Driver and Novel Coronavirus.                                                                                                 | China                                | European Review for Medical and Pharmacological Sciences | Italy              | No                                  | Published       |
| <b>Zhang, W</b>                                | Pre- and Posttreatment Chest CT Findings: 2019 Novel Coronavirus (2019-nCoV) Pneumonia.                                                              | China                                | Intensive Care Medicine                                  | Germany            | Yes                                 | Published       |
| <b>Zhang, X</b>                                | Evolution of CT Manifestations in a Patient Recovered from 2019 Novel Coronavirus (2019-nCoV) Pneumonia in Wuhan, China.                             | China                                | Blood Advances                                           | USA                | Yes                                 | Published       |
| <b>Zhang, X</b>                                | The First Case of 2019 Novel Coronavirus Pneumonia Imported into Korea from Wuhan, China: Implication for Infection Prevention and Control Measures. | China                                | Japanese Journal of Radiology                            | Japan              | Yes                                 | Published       |
| <b>Zhou, B</b>                                 | A new coronavirus associated with human respiratory disease in China.                                                                                | China                                | Journal of thrombosis and thrombolysis                   | USA                | Yes                                 | Published       |
| <b>Zhou, C</b>                                 | 2019 Novel Coronavirus (2019-nCoV) Pneumonia.                                                                                                        | China                                | The Lancet Infectious Diseases                           | UK                 | Yes                                 | Published       |
| <b>Zhu, L</b>                                  | First Case of 2019 Novel Coronavirus in the United States.                                                                                           | China                                | American Journal of Transplantation                      | USA                | Yes                                 | Published       |
| <b>Zhu, W</b>                                  | CT Imaging of the 2019 Novel Coronavirus (2019-nCoV) Pneumonia.                                                                                      | China                                | Neurosurgery                                             | USA                | Yes                                 | Published       |

1  
2  
3  
4  
5  
6  
7  
8  
9  
10  
11  
12  
13  
14  
15  
16  
17  
18  
19  
20  
21  
22  
23  
24  
25  
26  
27  
28  
29  
30  
31  
32  
33  
34  
35  
36  
37  
38  
39  
40  
41  
42  
43  
44  
45  
46  
47  
48  
49  
50  
51  
52  
53  
54  
55  
56  
57  
58  
59  
60

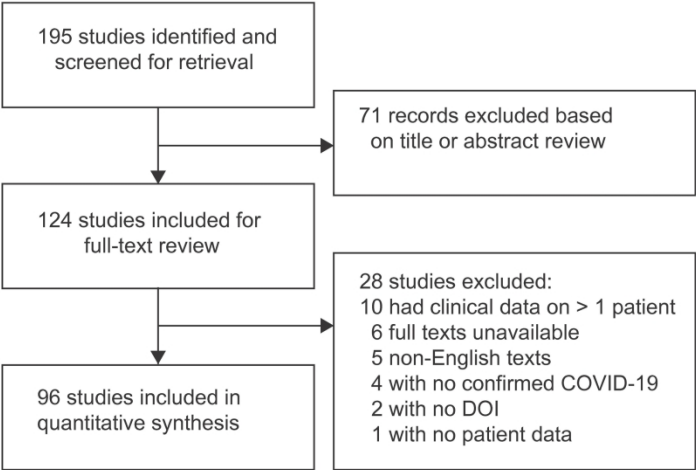

Figure 1. Search flow. COVID-19, coronavirus 2019; DOI, digital object identifier  
215x279mm (300 x 300 DPI)

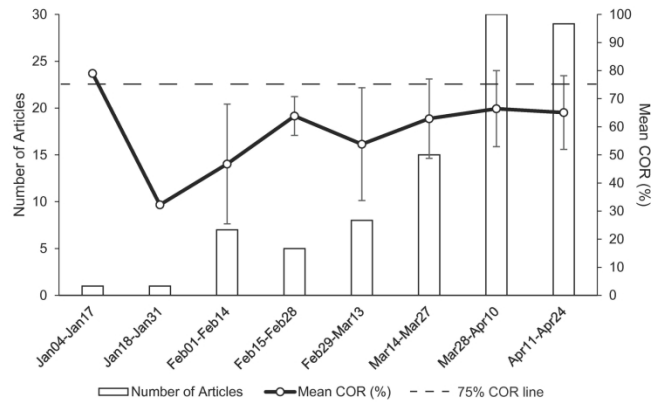

Figure 2. Number of case reports published on COVID-19 from the beginning of 2020 to the date of the search (April 24, 2020) with corresponding mean completeness of reporting (COR) scores. COR, completeness of reporting.

215x279mm (300 x 300 DPI)
